# Supplementary material for: Astrocytic Nrf2 Mediates the Neuroprotective and Anti-Inflammatory Effects of Nootkatone in an MPTP-Induced Parkinson’s Disease Mouse Model
Source: MDPI journal article supplement (doi:10.3390/antiox12111999), 2023-11-13
Supplement: s1 [file s1]

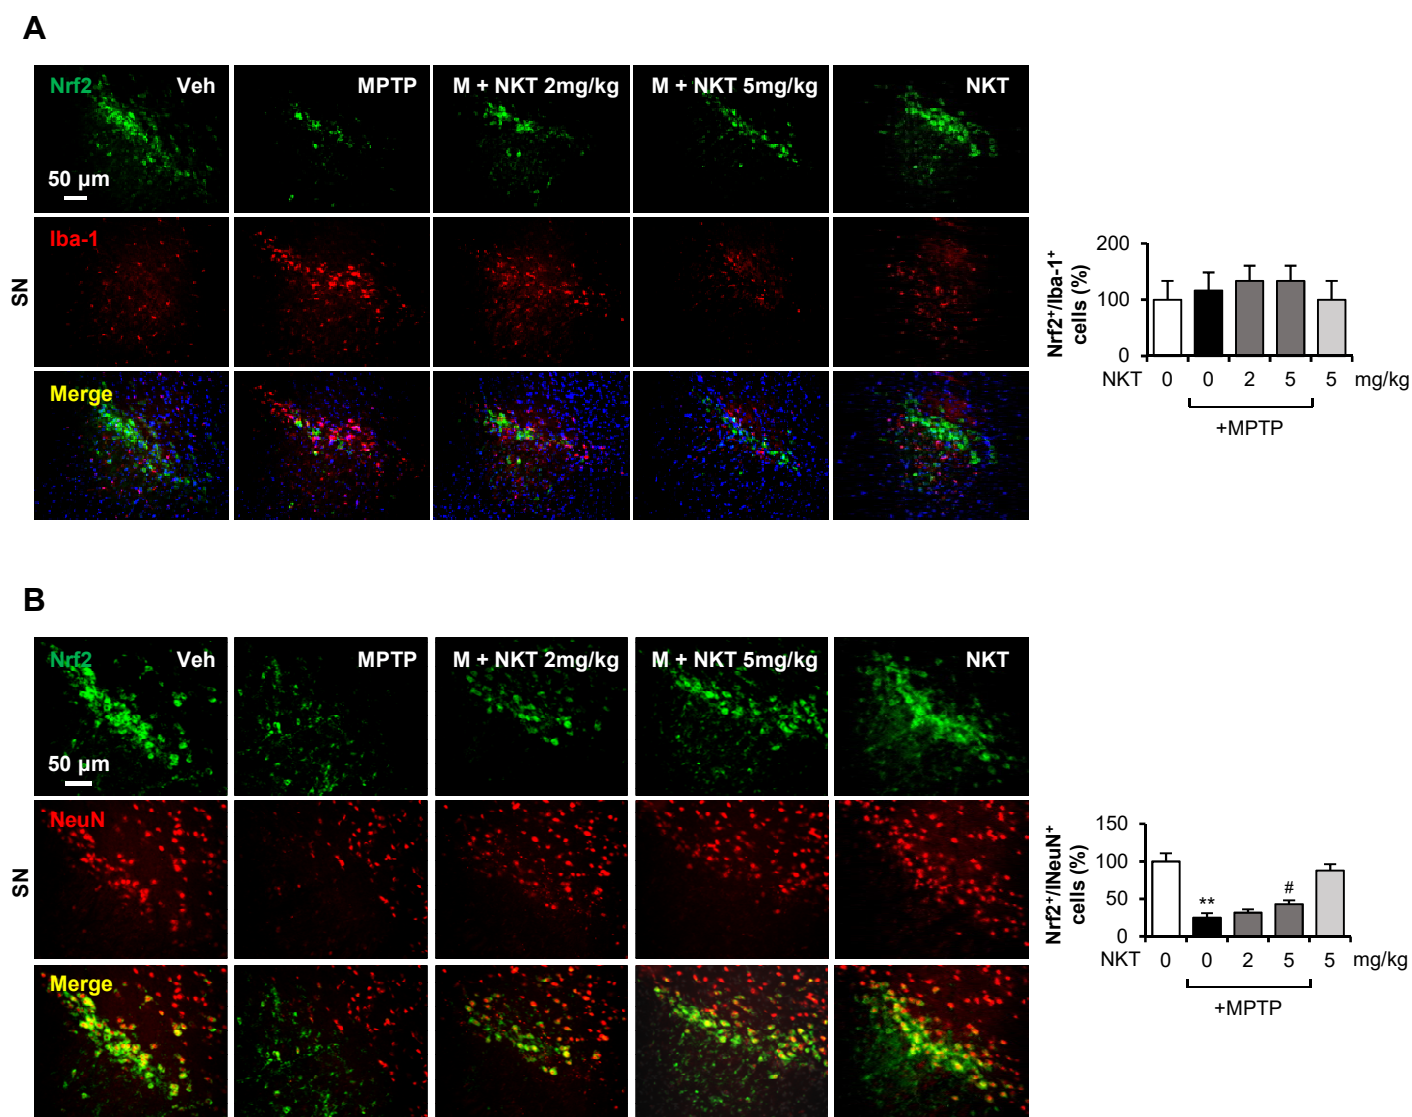

**Figure S1. Effects of NKT on microglial/neuronal Nrf2 expression in the brains of MPTP-treated mice.** (A) IF staining data showing Nrf2 and Iba-1 expression in the SN of MPTP mice ( $n = 6-7$ , three sections per brain). Representative images are provided in the left panel, and quantification of Nrf2<sup>+</sup>/Iba-1<sup>+</sup> cells is shown in the right panel. (B) IF staining showing Nrf2 and NeuN expression in the SN of MPTP mice ( $n = 6-7$ , three sections per brain). Representative images are shown in the left panel, and quantification of Nrf2<sup>+</sup>/NeuN<sup>+</sup> cells is shown in the right panel. Data are presented as the mean  $\pm$  SEM. \*\* $p < 0.01$  vs. control group; # $p < 0.05$  vs. MPTP-treated group.

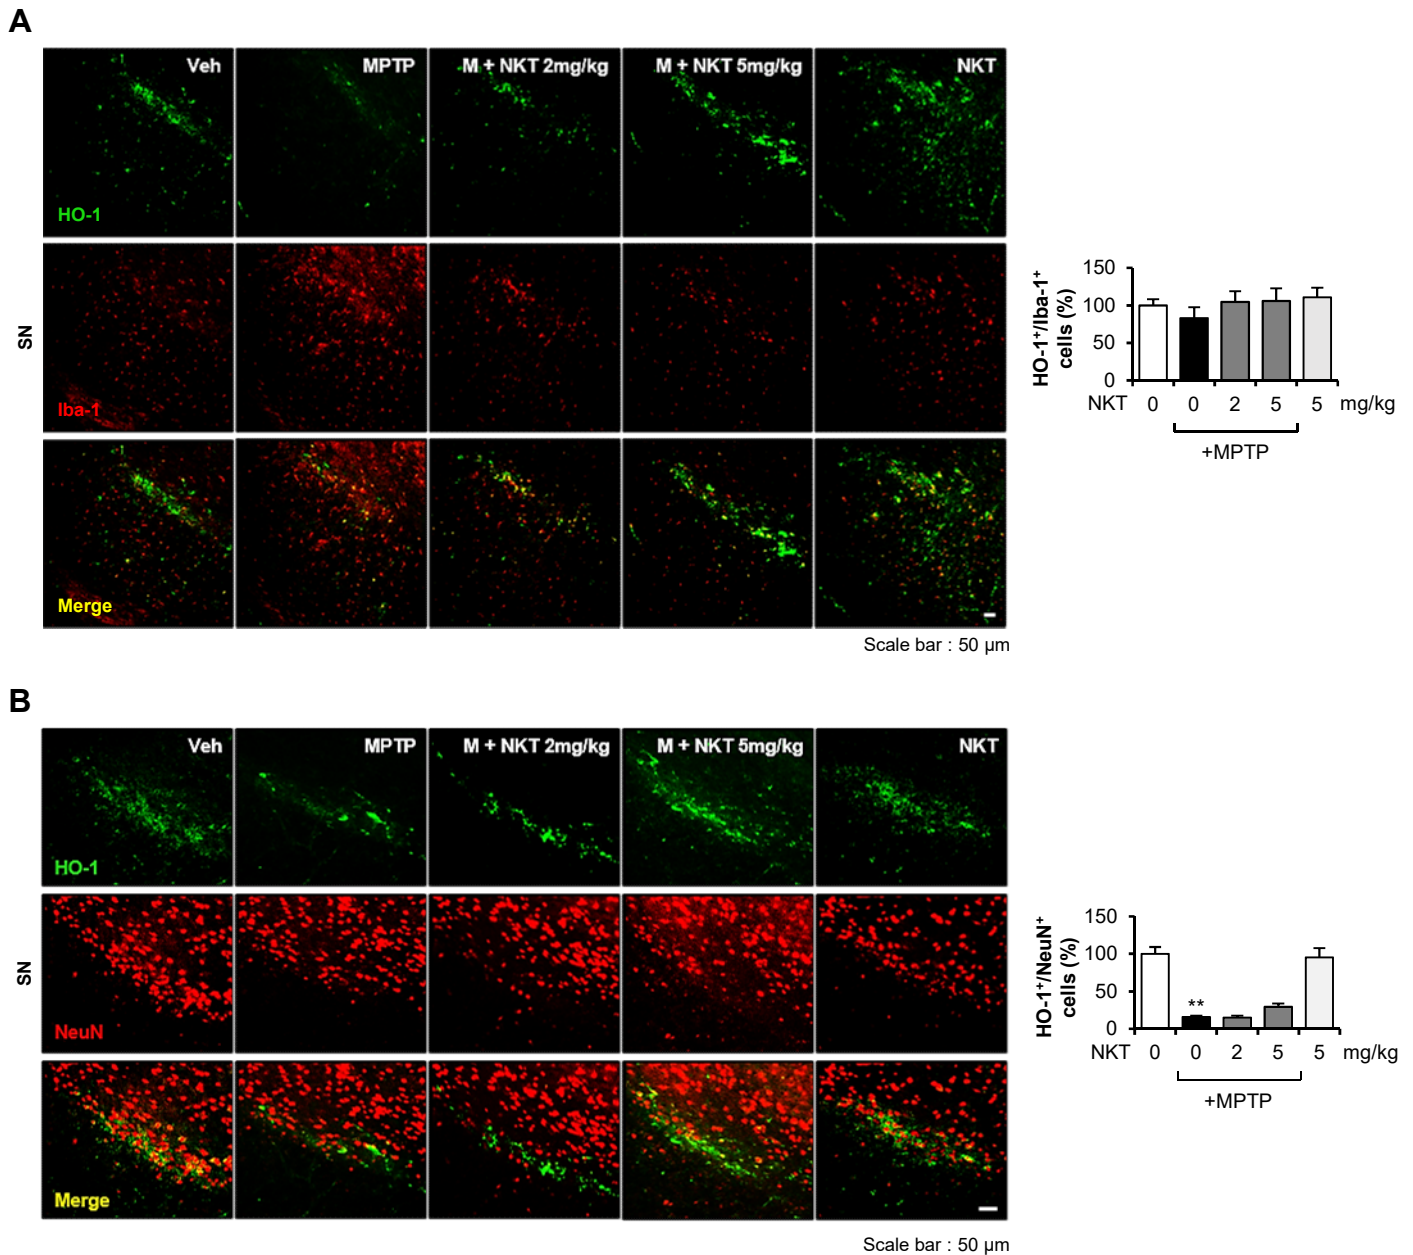

**Figure S2. Effects of NKT on microglial/neuronal HO-1 expression in the brains of MPTP-treated mice.** (A) IF staining data showing HO-1 and Iba-1 expression in the SN of MPTP-treated mice (n = 6–7, three sections per brain). Representative images are provided in the left panel, and quantification of HO-1<sup>+</sup>/Iba-1<sup>+</sup> cells is shown in the right panel. (B) IF staining results showing HO-1 and NeuN expression in the SN of MPTP-treated mice (n = 6–7, three sections per brain). Representative images are provided in the left panel, and quantification of HO-1<sup>+</sup>/NeuN<sup>+</sup> cells is shown in the right panel. Data are presented as the mean  $\pm$  SEM. \*\* $p$  < 0.01 vs. control group.

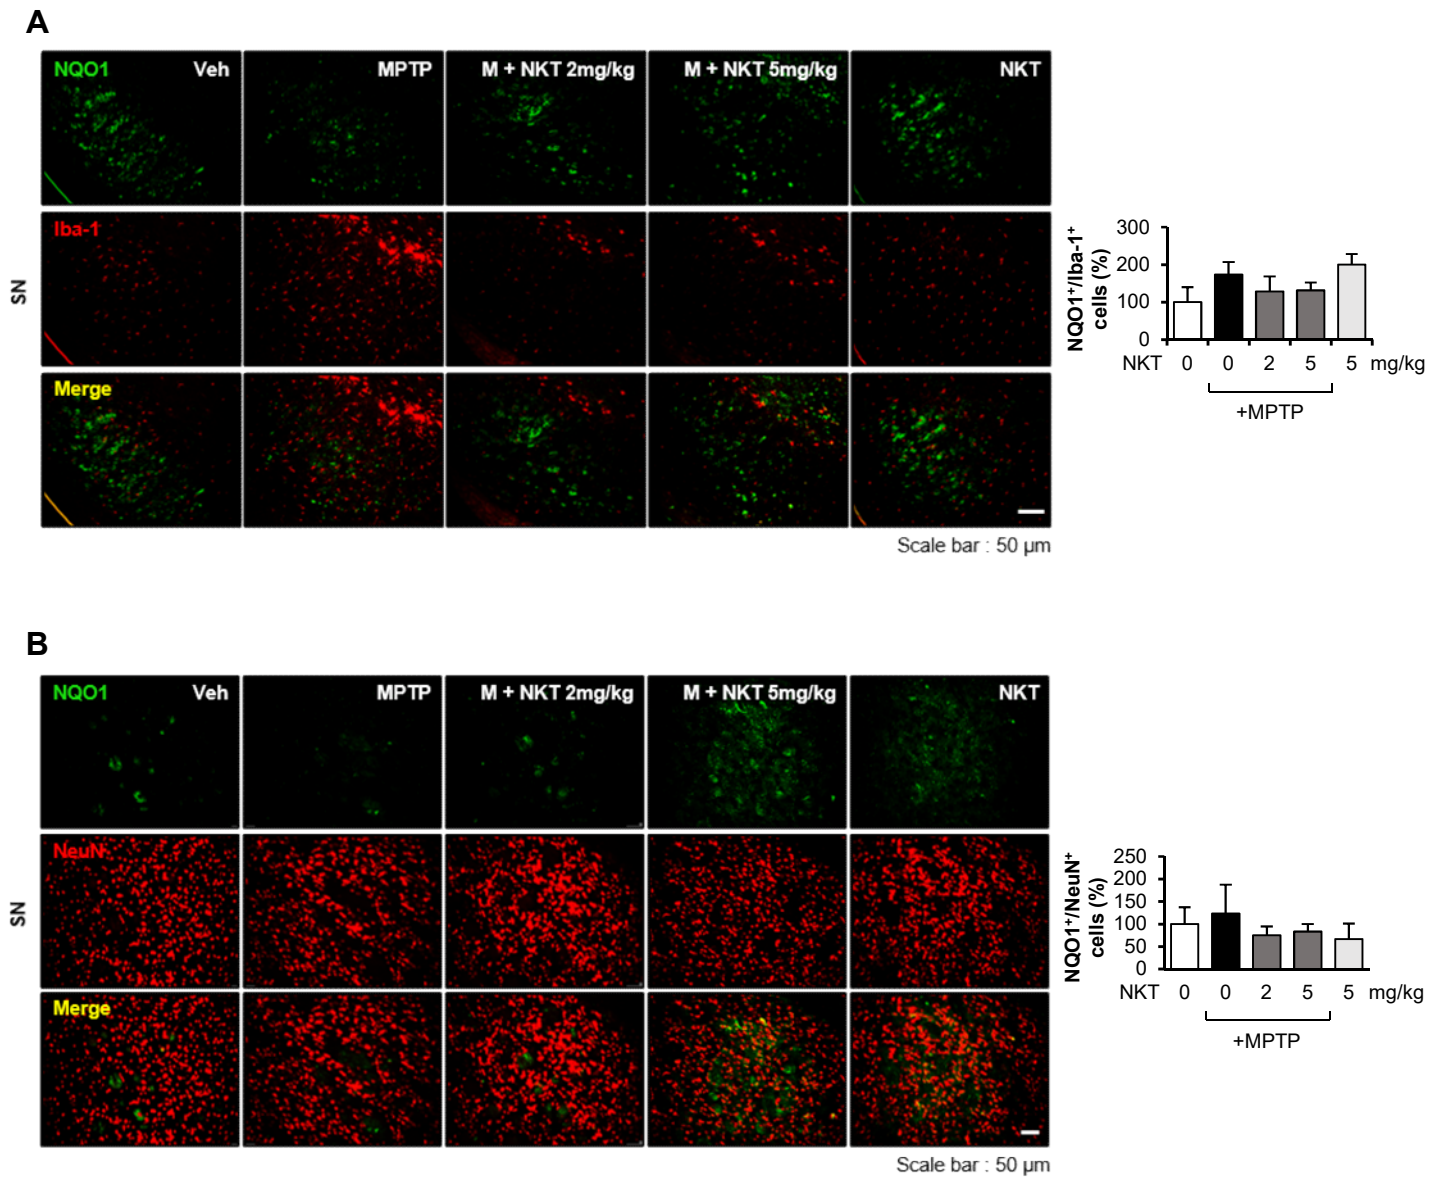

**Figure S3. Effects of NKT on microglial/neuronal NQO1 expression in the brains of MPTP-treated mice.** (A) IF staining results showing NQO1 and Iba-1 expression in the SN ( $n = 6-7$ , three sections/brain). Representative images are shown in the left panel, and quantification of NQO1<sup>+</sup>/Iba-1<sup>+</sup> cells is shown in the right panel. (B) IF staining results showing NQO1 and NeuN expression in the SN of MPTP mice ( $n = 6-7$ , three sections per brain). Representative images are shown in the left panel, and quantification of NQO1<sup>+</sup>/NeuN<sup>+</sup> cells is shown in the right panel. Data are presented as the mean  $\pm$  SEM.
