# Supplementary material for: Astrocytic Nrf2 Mediates the Neuroprotective and Anti-Inflammatory Effects of Nootkatone in an MPTP-Induced Parkinson’s Disease Mouse Model
Source: MDPI journal article supplement (doi:10.3390/antiox12111999), 2023-11-13
Supplement: s1 [file s1]

**Table S1.** List of primary antibodies used in western blot analysis

| <b>Antigen</b> | <b>Manufacturer</b> | <b>Catalog number</b> | <b>Dilution</b> |
|----------------|---------------------|-----------------------|-----------------|
| TH             | Cell Signaling      | 58844                 | 1:2000          |
| p-CREB         | Cell Signaling      | 9198                  | 1:2000          |
| NQO1           | Cell Signaling      | 62262                 | 1:5000          |
| Bcl2           | Abcam               | ab59348               | 1:5000          |
| GDNF           | Abcam               | ab18956               | 1:2000          |
| Iba-1          | Wako                | 019-19741             | 1:2000          |
| iNOS           | BD bioscience       | 610431                | 1:2000          |
| TNF- $\alpha$  | Santa Cruz          | 133192                | 1:500           |
| IL-6           | Santa Cruz          | 57315                 | 1:500           |
| TLR2           | Santa Cruz          | 10739                 | 1:2000          |
| TLR4           | Santa Cruz          | 10741                 | 1:2000          |
| IL-10          | Santa Cruz          | 365858                | 1:500           |
| Nrf2           | Santa Cruz          | 722, 365949           | 1:500           |
| TGF- $\beta$   | Santa Cruz          | 146                   | 1:500           |
| PGC-1 $\alpha$ | Millipore           | ST1202                | 1:1000          |
| HO-1           | Enzo Life           | ADI-SPA-895           | 1:5000          |
| MnSOD          | Enzo Life           | ADI-SOD-111           | 1:5000          |
| 4-HNE          | Alpha diagnostic    | HNE11-S               | 1:5000          |
| COX-2          | MyBioSource         | MBS9410607            | 1:2000          |
| IL-1 $\beta$   | MyBioSource         | MBS175705             | 1:2000          |
| GCLC           | MyBioSource         | MBS9132879            | 1:5000          |
| GCLM           | GeneTex             | GTX114075             | 1:5000          |
| GFAP           | Sigma-Aldrich       | G3893                 | 1:5000          |
| BDNF           | Sigma-Aldrich       | SAB2108004            | 1:2000          |
| $\beta$ -actin | Sigma-Aldrich       | A1978                 | 1:10000         |

**Table S2.** List of primary antibodies used in IHC and IF staining

| <b>Antigen</b> | <b>Manufacturer</b> | <b>Catalog number</b> | <b>Dilution</b> |
|----------------|---------------------|-----------------------|-----------------|
| TH             | Cell Signaling      | 58844                 | 1:2000          |
| GFAP           | Sigma-Aldrich       | G3893                 | 1:5000          |
| Iba-1          | Wako                | 019-19741             | 1:2000          |
| NeuN           | Millipore           | MAB377                | 1:2000          |
| Nrf2           | Santa Cruz          | 722                   | 1:1000          |
| HO-1           | Enzo Life           | ADI-SPA-895           | 1:5000          |
| NQO1           | Cell Signaling      | 62262                 | 1:5000          |
| 8-OHdG         | Antibodies-online   | ABIN674319            | 1:1000          |
